# Supplementary material for: Impact of Dysfunctional Feed-Forward Inhibition on Glutamate Decarboxylase Isoforms and γ-Aminobutyric Acid Transporters
Source: MDPI journal article supplement (doi:10.3390/ijms22147740), 2021-07-20
Supplement: s1 [file s1]

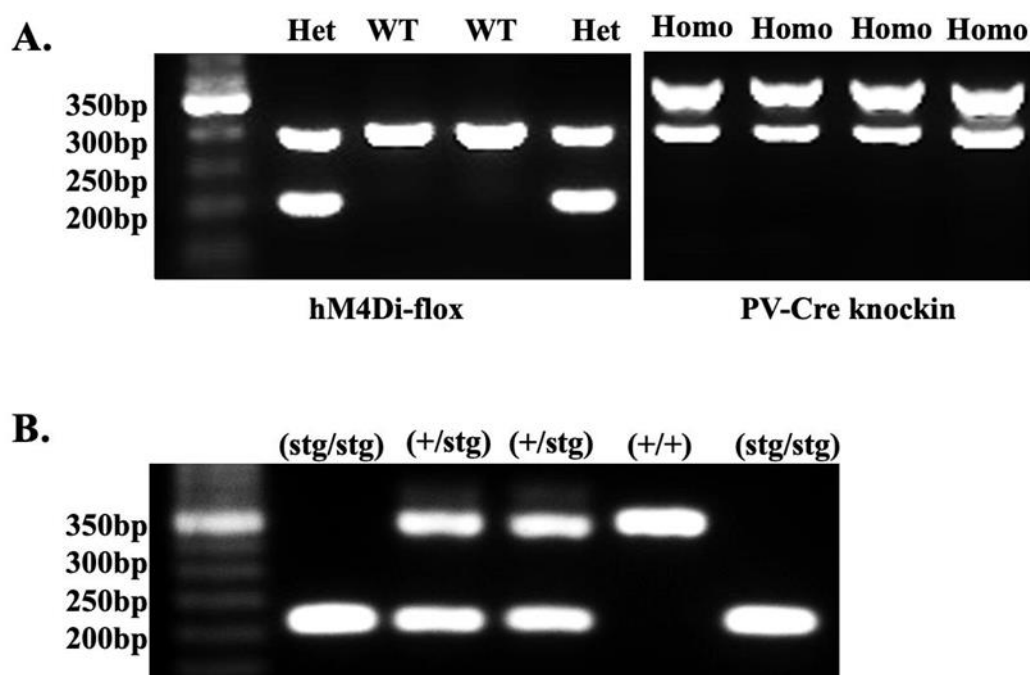

Supplementary Fig. S1 Representative images of genotype bands on agarose gel. (A) Images showing the homozygous (Homo) PV-Cre knockin (350bp and 300bp) and the hM4Di-flox for four mice to verify PV-Cre knockin and hM4Di-flox [for hM4Di-flox: heterozygous (het) 300 bp and 204 bp; wild-type (WT) 300 bp] (B) Images showing the bands for wild-type (+/+) mice at 360 bp, heterozygous (+/stg) mice with two bands at 360 bp and 155 bp, and epileptic stargazers (stg/stg) with a band at 155 bp.

**Table S1.** Primers used for genotyping of PV<sup>Cre</sup>/Gi-DREADD mice and stargazer mice.

| Primer type                            | Sequence (5'→3')              |
|----------------------------------------|-------------------------------|
| <b>PV<sup>Cre</sup>/Gi-DREADD mice</b> |                               |
| hM4Di mutant forward                   | CGA AGT TAT TAG GTC CCT CGA C |
| hM4Di mutant reverse                   | TCA TAG CGA TTG TGG GAT GA    |
| Wild type forward                      | AAG GGG CTG CAG TGG AGT A     |
| Wild type reverse                      | CCG AAA ATC TGT GGG AAG TC    |
| Cre forward                            | CCT GGA AAA TGC TTC TGT CCG   |
| Cre reverse                            | CAG GGT GTT ATA AGC AAT CCC   |
| <b>Stargazer mice</b>                  |                               |
| Common forward                         | TAC TTC ATC CGC CAT CCT TC    |
| Wild type reverse                      | TGG CTT TCA CTG TCT GTT GC    |
| Mutant reverse                         | GAG CAA GCA GGT TTC AGG C     |
